# Supplementary material for: Effects of substrate temperature on the crystallization process and properties of mixed-ion perovskite layers
Source: Royal Society of Chemistry journal article supplement (doi:10.1039/c8ta10170a), 2019-01-01
Supplement: c8ta10170a1.pdf [file c8ta10170a1.pdf]

## Supporting Information

### Effect of substrate temperature on the crystallization process and properties of mixed-ions perovskite layers

Haiyan Zhang,<sup>a,b</sup> Chen Zhao,<sup>b</sup> Deng Li,<sup>b</sup> Heng Guo,<sup>a</sup> Feiyi Liao,<sup>b</sup> Wei Cao,<sup>b</sup>

Xiaobin Niu,<sup>\*a</sup> and Yiying Zhao <sup>\*b</sup>

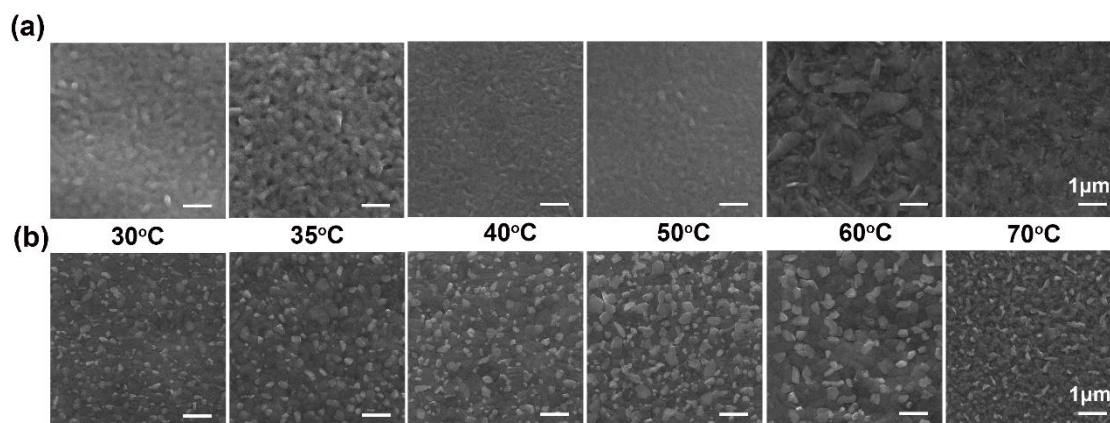

Fig. S1 SEM images of fresh perovskite thin films (a) and annealed perovskite films (b) spin-coated onto substrates with different temperatures.

Table S1 The surface thickness and roughness of the perovskite films spin-coated on the substrates with different temperatures.

|       | Thickness(nm) | Roughness(nm) |
|-------|---------------|---------------|
| 30 °C | 418           | 16.1          |
| 35 °C | 503           | 18.2          |
| 40 °C | 592           | 33.9          |
| 50 °C | 918           | 428.9         |
| 60 °C | 150-4000      | 1766.1        |
| 70 °C | 0-5000        | 2294.7        |

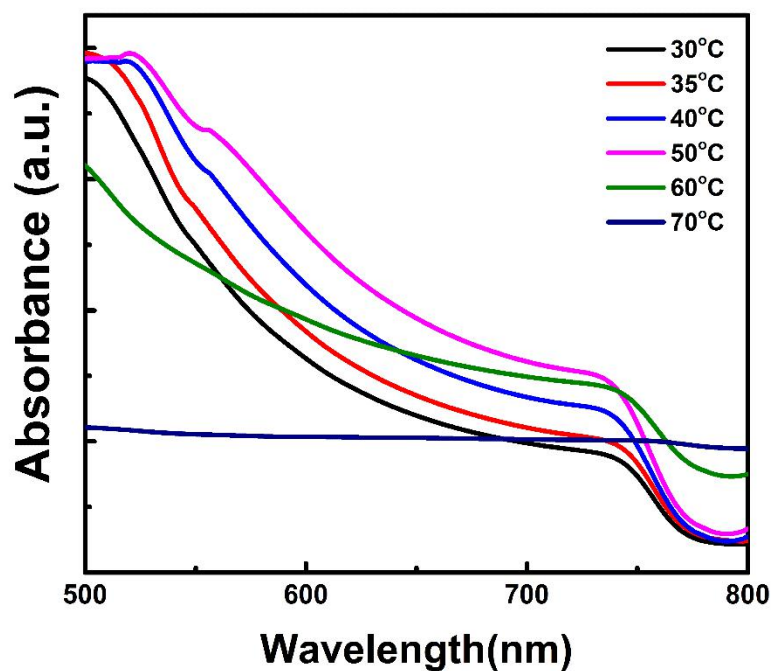

Fig. S2 The UV-Vis absorption spectra of the annealed perovskite films spin-coated on substrates with different temperatures.

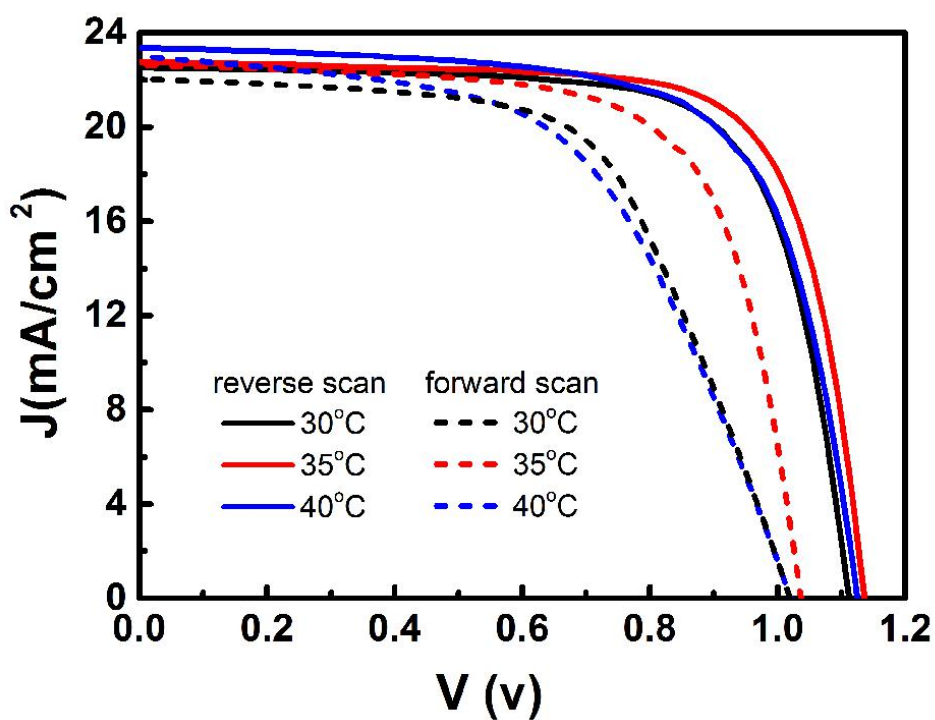

Fig. S3 Typical current density–voltage (J–V) reverse and forward scans of devices prepared on substrates with temperatures of 30 °C, 35 °C, and 40 °C.

Table S2 Photovoltaic parameters of the forward and reverse scans of the best PSCs fabricated at different substrate temperatures.

|       |              | Voc (v) | Jsc (mA/cm <sup>2</sup> ) | FF (%) | PCE (%) |
|-------|--------------|---------|---------------------------|--------|---------|
| 30 °C | Reverse scan | 1.092   | 22.92                     | 71.36  | 17.87   |
|       | Forward scan | 1.023   | 22.06                     | 57.43  | 12.96   |
| 35 °C | Reverse scan | 1.135   | 22.75                     | 73.72  | 19.03   |
|       | Forward scan | 1.036   | 22.61                     | 68.71  | 16.11   |
| 40 °C | Reverse scan | 1.125   | 23.35                     | 70.29  | 18.05   |
|       | Forward scan | 1.029   | 23.07                     | 54.93  | 13.04   |
| 50 °C | Reverse scan | 0.935   | 22.35                     | 62.46  | 13.06   |
|       | Forward scan | 0.886   | 22.11                     | 43.08  | 8.43    |
| 60 °C | Reverse scan | 0.845   | 17.56                     | 44.06  | 6.54    |
|       | Forward scan | 0.623   | 16.51                     | 32.68  | 3.36    |
| 70 °C | Reverse scan | 0.657   | 16.22                     | 40.33  | 4.31    |
|       | Forward scan | 0.572   | 16.19                     | 32.51  | 3.01    |

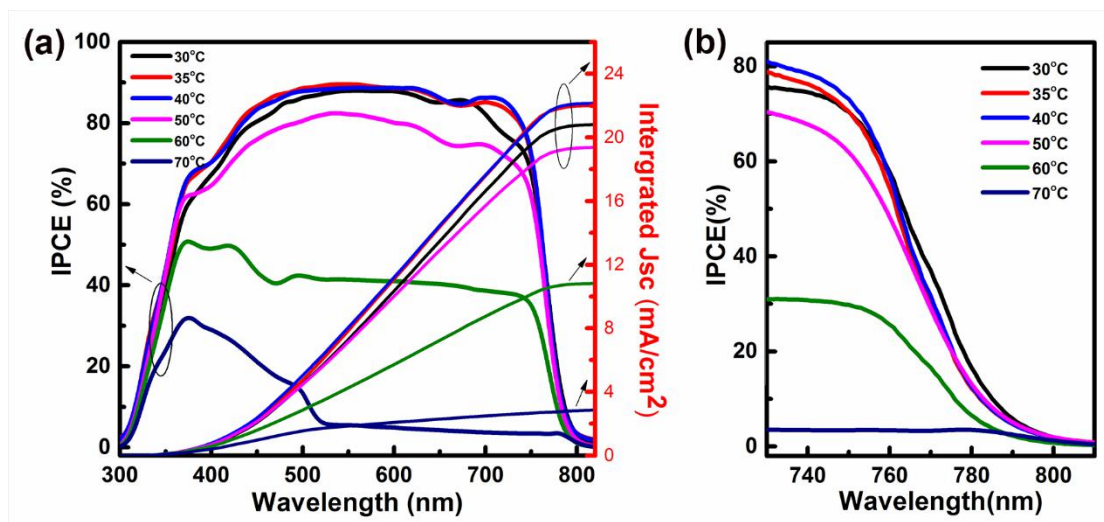

Fig. S4 (a) The incident photon-to-current conversion efficiency (IPCE), IPCE data-based integrated current density and (b) the absorption edge of the IPCE of the PSCs prepared at different substrate temperatures.

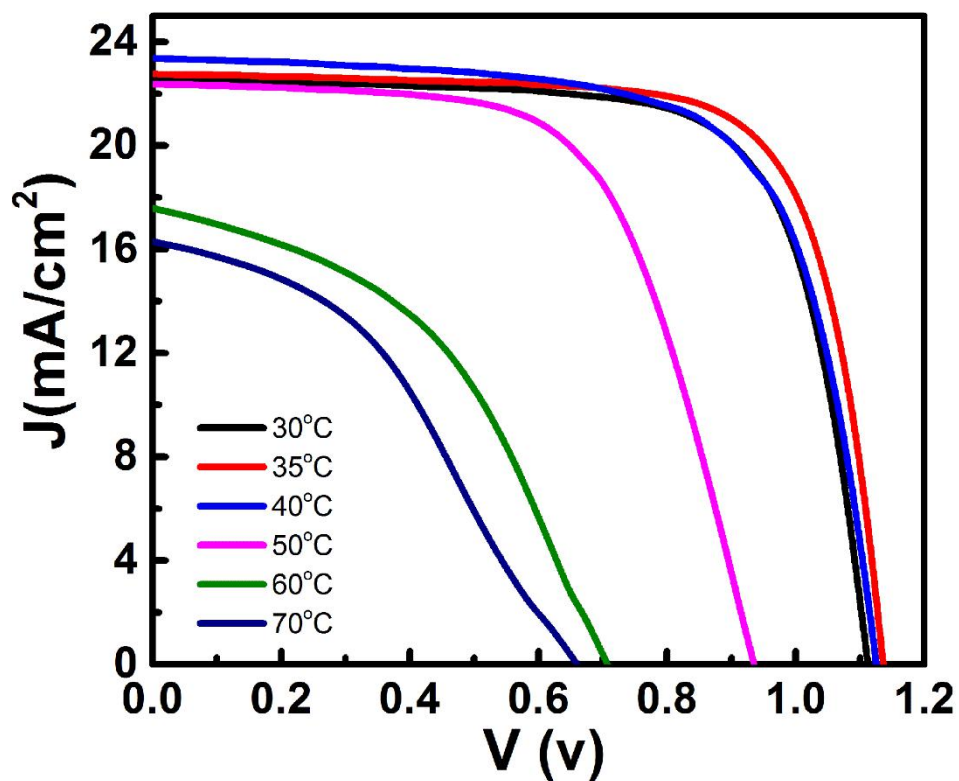

Fig.S5 Typical J-V reverse scan of PSCs prepared at different substrate temperatures from 30 °C to 70 °C.

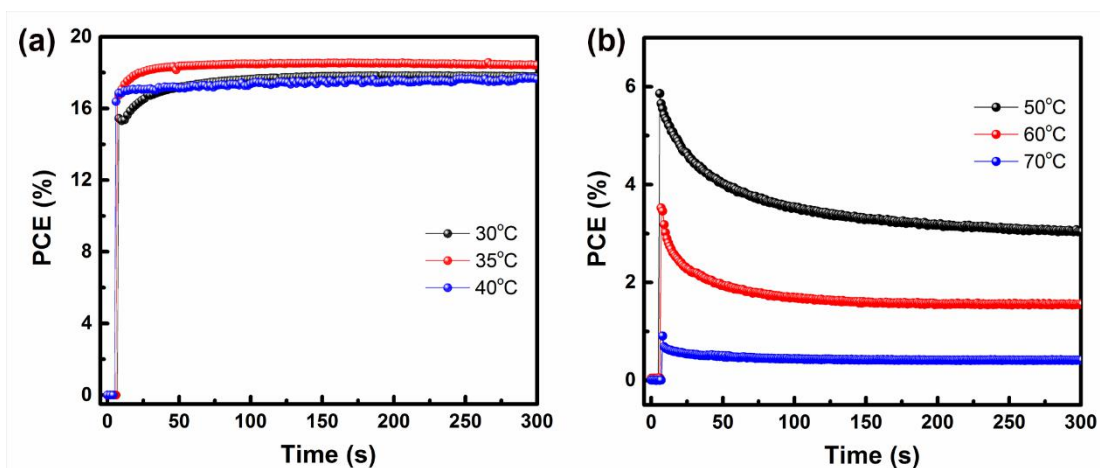

Fig. S6 Steady-state PCEs at Max Power Point conditions measured as a function of time; for PSCs fabricated at different substrate temperatures (30°C, 35°C, 40°C, 50°C, 60°C and 70°C) biased at 0.94V, 0.95V, 0.9V, 0.72V, 0.48V and 0.26V, respectively.

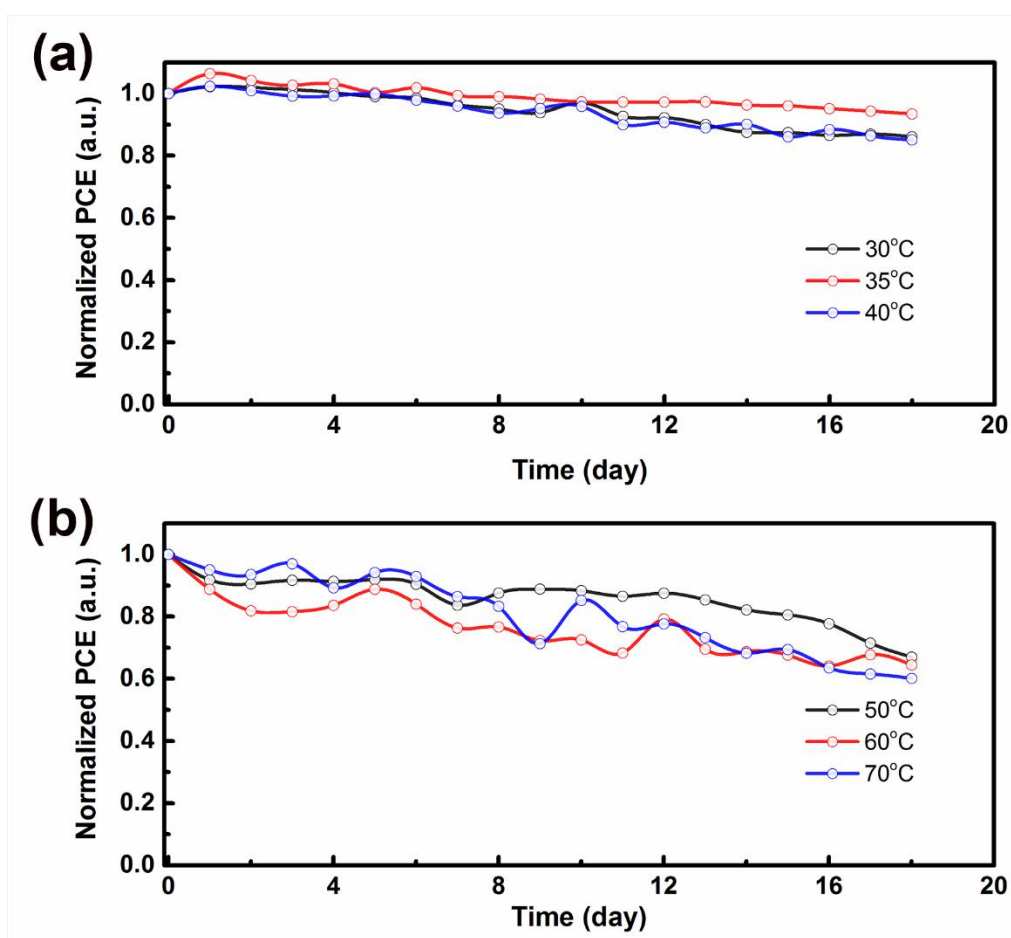

Fig. S7 Stability testing (storing 18 days in glove box at room temperature) for PSCs prepared at different substrate temperatures.
